# Supplementary material for: Genome-wide identification of endogenous viral sequences in alfalfa (Medicago sativa L.)
Source: Springer Nature journal article supplement (doi:10.1186/s12985-021-01650-9), 2021-09-09
Supplement: MOESM1 [file 19647474]

**File S1: Endogenous viral sequences identified in *M. sativa* tetraploid and diploid genomes**

**Viral sequences integrated in *Medicago sativa* tetraploid genome\***

=====  
>Msativa4n|movement-chr3.2-1 12102273 12102514 93375939 (SbCMV)  
TATAGATCTATCTAAATCTATATCTTTTAGGGATACTCATATTTGTAAATTTATATCAAATTTTCATTTTT  
CCATATTTTAGATTACATTTTCCTTTTGCAATTATTGCTTGTTCCTTATCTAGAATCCTAGAGTCTTCTA  
AGGCTATTTCTAAAGGTGAATCAATACCTTTTCATGAAGGTACTTTTAATTAGAATTTGAATGGTTGATAT  
ATGAATATAACCAATCTTTCTTCTTTTCGTTTT  
>Msativa4n|capsid-chr1.1-1 24245905 24245998 82459472  
AGAAGAATTCATGTCCCAAAGGTAAGAAAACATGCACATGTTGGTTGTGTCATGAAGAAGGACATTATGC  
AAATGAGTGTCCCTAAGAAGAAAA  
>Msativa4n|capsid-chr1.1-2 61882589 61882679 82459472  
AAAGAATTCATGTCCCAAAGGTAAGAAAACATGCACATGTTGGCTGTGTCATGAAGAAGGACATTATGCA  
AATGAGTGTCCCTAAGAAGAAA  
>Msativa4n|capsid-chr1.1-3 52399578 52399668 82459472  
AAAGAATTCATGTCCCTAAAGGCAAGAAAACATGCACAAGTTGGTTGTGTCATGAAGAAGGACATTATGCA  
AATGAGTGTCCCTAAGAAGAAA  
>Msativa4n|capsid-chr1.2-1 79956260 79956350 86910131  
AAAGAATTCATGTCCCAAAGGTAAGAAAACATGCACATGCTGGTTGTGTCATGAAGAAGGACATTATGCA  
AATGAGTGTCCCTAAGAAGAAA  
>Msativa4n|capsid-chr1.2-2 53436684 53436774 86910131  
AAAGAATTCATGTCCCTAAAGGCAAGAAAACATGCACAAGTTGGTTGTGTCATGAAGAAGGACATTATGCA  
AATGAGTGTCCCTAAGAAGAAA  
>Msativa4n|capsid-chr1.2-3 76498370 76498441 86910131  
TTTCTTTTTGGGACACTCATTTCGATAATGTCTTCTTCATTACACAACCAACATGTGCATGTTTTCTTT  
CC  
>Msativa4n|capsid-chr1.3-1 22851264 22851357 79881340  
AGAAGAATTCATGTCCCAAAGGTAAGAAAACATGCACATGTTGGTTGTGTCATGAAGAAGGACATTATGC  
AAATGAGTGTCCCTAAGAAGAAAA  
>Msativa4n|capsid-chr1.3-2 31015440 31015530 79881340  
AAAGAATTCATGTCCCAAAGGCAAGAAAACATGCACATGTTGGTTGTGTCATGAAGAAGGACATTATGCA  
AATGAGTGTCCCTAAAAAGAAA  
>Msativa4n|capsid-chr1.3-3 50975822 50975912 79881340  
TTTCTTCTTAGGACACTCATTTCGATAATGTCTTCTTCATTACACAACCAACATGTGCATGTTTTCTTA  
CCTTTGGGACATGAATTCTTT  
>Msativa4n|capsid-chr1.3-4 70582004 70582075 79881340  
TTTCTTTTTGGGACACTCATTTCGATAATGTCTTCTTCATTACACAACCAACATGTGCATGTTTTCTTT  
CC  
>Msativa4n|capsid-chr1.3-5 70593676 70593747 79881340  
TTTCTTTTTGGGACACTCATTTCGATAATGTCTTCTTCATTACACAACCAACATGTGCATGTTTTCTTT  
CC  
>Msativa4n|capsid-chr1.3-6 70618639 70618710 79881340  
TTTCTTTTTGGGACACTCATTTCGATAATGTCTTCTTCATTACACAACCAACATGTGCATGTTTTCTTT  
CC  
>Msativa4n|capsid-chr1.4-1 24248476 24248569 88815615  
AGAAGAATTCATGTCCCAAAGGTAAGAAAACATGCACATGTTGGTTGTGTCATGAAGAAGGACATTATGC  
AAATGAGTGTCCCTAAGAAGAAAA  
>Msativa4n|capsid-chr1.4-2 57162046 57162136 88815615  
AAAGAATTCATGTCCCTAAAGGCAAGAAAACATGCACAAGTTGGTTGTGTCATGAAGAAGGACATTATGCA

AATGAGTGTCTAAGAAGAAA  
>Msativa4n|capsid-chr2.2-1 66145004 66145094 74215936  
AAAGAATTCATGTCCCAAAGGCAAGAAAACATGCACATGTTGGTTGTGTCATGAAGAAGGACATTATGCA  
AATGAGTGTCTAAAAAGAAA  
>Msativa4n|capsid-chr3.2-1 86276468 86276548 93375939  
TTTCTTTTTGGGACACTCATTTCATAATGTCTTCTTCATTGCACAACCAACATGTGCATGTTTTCTTA  
CCTTTGGGACA  
>Msativa4n|capsid-chr3.4-1 58412334 58412399 100414524  
GGAAAGAAAACATGCACATGTTGGTTGTGTAATGAAGAAGGACATTATGCAAATGAGTGTCCCAA  
>Msativa4n|capsid-chr4.1-1 44420974 44421064 90245664  
AAAGAATTCATGCCCTAAAGGCAAGAAAACATGCACATGTTGGTTGTGTCATGAAGAAGGACATTATGCA  
AATGAGTGTCCAAAAAGAAA  
>Msativa4n|capsid-chr4.2-1 48658594 48658684 93947428  
AAAGAATTCATGCCCTAAAGGCAAGAAAACATGCACATGTTGGTTGTGTCATGAAGAAGGACATTATGCA  
AATGAGTGTCCAAAAAGAAA  
>Msativa4n|capsid-chr4.3-1 76987568 76987658 90228617  
AAAGAATTCATGTCCCAAAGGCAAGAAAAAATGTACATGTTGGTTGTGTCATGAAGAAGGACATTATGCA  
AATGAGTGTCCAAAGAGGAAA  
>Msativa4n|capsid-chr4.4-1 48637844 48637934 90896203  
AAAGAATTCATGCCCTAAAGGCAAGAAAACATGCACATGTTGGTTGTGTCATGAAGAAGGACATTATGCA  
AATGAGTGTCCAAAAAGAAA  
>Msativa4n|capsid-chr5.1-1 4026950 4027040 81211777  
AAAGAATTCATGTCCCAAAGGTAAGAAAACATGCACATGTTGGCTATGCCATGAAGAAGGACATTATGCA  
AATGAGTGTCTAAGAAGAAA  
>Msativa4n|capsid-chr5.2-1 79168509 79168599 84165483  
AAAGAATTCATGTCCCAAAGGTAAGAAAACATGCACATGTTGGCTGTGTCATGAAGAAGGACATTATGCA  
AATGAGTGTCTAAGAAGAAA  
>Msativa4n|capsid-chr5.3-1 12480248 12480338 80712490  
AAAGAATTCATGTCCCAAAGGTAAGAAAACATGCACATGTTGGCTGTGTCATGAAGAAGGACATTATGCA  
AATGAGTGTCTAAGAAGAAA  
>Msativa4n|capsid-chr5.4-1 66457654 66457747 78626892  
TTTTTCTTCTTAGGACACTCATTTCATAATGTCTTCTTCATGACACAACCAACATGTGCATGTTTTCT  
TACCTTTGGGACATGAATTCTTCT  
>Msativa4n|capsid-chr5.4-2 53029604 53029674 78626892  
TTTCTTTTTGGGACACTCATTTCATAATGTCTTCTTCATTACACAACCAACATCATGTTTTCTTTCCT  
T  
>Msativa4n|capsid-chr6.1-1 53224485 53224576 80303593  
CTTTTCTTTCGGACACTCATTTCATAATGTCTTCTTCATGGCACAACCAACATGTGCAAGTTTTCTTT  
CCTTTGGGCAAGAAATTTTCT  
>Msativa4n|capsid-chr6.2-1 71199572 71199661 89579199  
TTCTTTTTGGGACACTCATTTCATAATGTCTTCTTCATTACACAACCAACATGTGCATGTTTTCTTTC  
CTTTAGGGCATGAATTTCTTT  
>Msativa4n|capsid-chr6.4-1 39640845 39640936 64534737  
CTTTTCTTTCGGACACTCATTTCATAATGTCTTCTTCATGGCACAACCAACATGTGCAAGTTTTCTTT  
CCTTTGGGCAAGAAATTTTCT  
>Msativa4n|capsid-chr6.4-2 37908281 37908370 64534737  
TTTCTTTTTAGGACACTCATTTCATAATGTCTTCTTCATGACACAACCAACATGTGCATGTTTTCTTG  
CCTTTGGGCGATGAATTTTT  
>Msativa4n|capsid-chr7.2-1 6578532 6578622 93528358  
TTTCTTCTTAGGACACTCATTTCATAATGTCTTCTTCATGACACAACCAACATGTGCATGTTTTCTTG  
CCTTTGGGACATGAATTTCTTT  
>Msativa4n|capsid-chr7.2-2 74367041 74367131 93528358

TTTCTTTTTGGGACACTCATTTCGATAATGTCCCTTCTTCATTACACAACCAACATGTGCATGTTTTCTTA  
CCTTTAGGGCATGAATTCTTT  
>Msativa4n|capsid-chr7.2-3 80890790 80890880 93528358  
AAAGAATTCATGTCCCAAAGGCAAGAAAACATGCACATGTTGGTTGTGTCATGAAGAAGGACATTATGCA  
AATGAGTGTCTAAGAAGAAA  
>Msativa4n|capsid-chr7.3-1 20541108 20541198 91580142  
CTTTTTTTTTGGGACACTCATTTCGATAATGTCCCTTCTTCATTACACAACCAACATGTGCATGTTTTCTTT  
CCTTTAGGGCATGAATTCTTT  
>Msativa4n|capsid-chr7.3-2 74966962 74967052 91580142  
TTTCTTTTTGGGACACTCATTTCGATAATGTCCCTTCTTCATTACACAACCAACATGTGCATGTTTTCTTA  
CCTTTAGGGCATGAATTCTTT  
>Msativa4n|capsid-chr7.4-1 30505904 30505995 94657719  
AGAAAAATTCCTGTCCAAAAGGAAAGAAAACCTGCACATGTTGGTTGTGCCATGAAGAAGGACATTATGC  
AAATGAGTGTCTAAGAAAAAG  
Msativa4n|capsid-chr8.1-1 45563162 45563252 87242343  
TTTCTTCTTAGGACACTCATTTCGATAATGTCCCTTCTTCATGACACAACCAACATGTGCATGTTTTCTTG  
CCTTTGGGACATGAATTCTTT  
>Msativa4n|capsid-chr8.1-2 38416637 38416728 87242343  
CTTTCTTCTTATGACACTCATTTCGATAATGTCCCTTCTTCATGACACAGCCAACATGTGCATGTTTTCTT  
ACCTTTGGGACATGAATTCTTT  
>Msativa4n|capsid-chr8.1-3 17091889 17091974 87242343  
TTTCTTCTTAGGACACTCATTTCGATAATGTCCCTTCTTCATGACACAACCAACATGTGCATGTTTTCTTA  
CCTTTGGGACATGAAT  
>Msativa4n|capsid-chr8.2-1 36532300 36532391 84274390  
CTTTCTTCTTATGACACTCATTTCGATAATGTCCCTTCTTCATGACACAGCCAACATGTGCATGTTTTCTT  
ACCTTTGGGACATGAATTCTTT  
>Msativa4n|capsid-chr8.3-1 42563286 42563376 82440740  
TTTCTTCTTAGGACACTCATTTCGATAATGTCCCTTCTTCATGACACAACCAACATGTGCATGTTTTCTTG  
CCTTTGGGACATGAATTCTTT  
=====  
=====

**Viral sequences integrated in *Medicago sativa* diploid genome\***

=====  
=====

>Msativa2n|movement-scaffold1037 349115 349677 504721 (SbCMV)  
AAGAAAATTTTAAAAGAAAATTTAGTAAACTTAAGGAATTTCTGTCAAGAAAAAATATTCTAAAATTTGG  
AATAATGGTAGGAGAGGAAGCAATTCCAATTGAAACAACATAATGGGAAAATAGTTATATCAACTATAGAT  
AAACAACAAATCGATAGAAGACTTGAAAAATTTCTGAAAATGAAAGAAGAAAGATTGGTTATATTCATA  
TATCAACCATTCAAATTTCTAATCAAAAGTACCTTCATGAAAGGTATTGATTACCTTTAAAAATAGCTCT  
AGAGGATTCTAGAATTAGAAATAAGAAACAAGCTGTAATTGCAAAAGGAAAATGTAATCTAAAATATGGA  
CAGATAAAATTTGACATAAATTTACAAATGGGATTATCCCTAAAAGATATAGATCTGAATAAATCTATAG  
TTTTTCATTATAAATTTGGAAGACTCAACATTTATGAAAGAAGGTAATCATCCTTTTACAATTTACTACAG  
AATTAATGCTTTGAGTAATTCACATCATAGCATAGAATTCATAGGAAAAGATACAATTCATATTGAT  
GAA  
>Msativa2n|capsid-scaffold1 1601229 1601319 1826351  
TTTTTCGATTGATTTTCGGATCCTTCTGACTTTTTTAAAGTACGTGTGTTGAATTTTGTATTTTTCTCTTT  
TCAATATTTCAAATGTTTGAT  
>Msativa2n|capsid-scaffold2341 61974 62064 112209  
TTTCTTTTTAGGACACTCATTTCGATAATGTCCCTTCTTCATGACACAACCAACATGTGCATGTTTTCTTG  
CCTTTGGGGCATGAATTCTTT  
>Msativa2n|capsid-scaffold356 215793 215884 739378

CTTTTCTTTGGACACTCATTTCGATAATGTCTTTTTTCACGACATAACCAACATGTGCATGTTTTCTTT  
CCTGTTGGACAGGAAGTTTTCT  
>Msativa2n|capsid-scaffold1050 251233 251323 296422  
TTTCTTCTTAGGACACTCATTTCGATAATGTCTTCTTCATGACACAACAAACACGTGCATGTCTTCTTG  
CCTTTAGGACATGAATTCTTT  
>Msativa2n|capsid-scaffold24 679399 679489 1172671  
AAAGAATTCATGTCCCAAAGGTAAGAAAACATGCACATGTTGGCTGTGTCATGAAGAAGGACATTATGCA  
AATGAGTGTCCTAAGAAGAAA  
>Msativa2n|capsid-scaffold537 814871 814961 1029455  
TTTCTTCTTAGGACACTCATTTCGATAATGTCTTCTTCATGACACAGCCAACATGTGCATGTTTTCTTA  
CCTTTGGGACATGAATTCTTT  
>Msativa2n|capsid-scaffold2519 99093 99182 157492  
AAAGAATTCATGCCCTAAAGGAAAGAAAACATGCACATGTTGGTTGTGTAATGAAGAAGGACATTATGCA  
AATGAGTGTCCCAAAAAGAAA  
>Msativa2n|capsid-scaffold342 808321 808411 981572  
TTTCTTCTTAGGACACTCATTTCGATAATGTCTTCTTCATGACACAACCAACATGTGCATGTTTTCTTG  
CCTTTAGGACATGAATTCTTT  
>Msativa2n|capsid-scaffold34 1556827 1556917 1744250  
CTTTTTTTTTGGGACACTCATTTCGATAATGTCTTCTTCATTACACAACCAACATGTGCATGTTTTCTTT  
CCTTTAGGGCATGAATTCTTT  
>Msativa2n|capsid-scaffold657 124647 124737 524074  
AAAGAATTCATGCCCTAAAGGTAAGAAAACATGCACATGTTGGTTGTGTAATGAAGAAGGACATTATGCA  
AATGAGTGTCCCAAAAAGAAA  
>Msativa2n|capsid-scaffold268 544456 544547 620361  
AGAAAAATTCCTTGCCCAAAGGAAAGAAAACCTGCACATGTTGGTTGTGCCATGAAGAAGGACATTATGC  
AAATGAGTGTCCTAAGAAAAAG  
>Msativa2n|capsid-scaffold396 266735 266806 543988  
GGAAAGAAAACATGCACATGTTGGTTGTGTAATGAAGAAGGACATTATGCAAATGAGTGTCCCAAAAAGA  
AA  
>Msativa2n|capsid-scaffold3656 6129 6219 29304  
aaagaattcatgccctaaggttaagaaaacatgcacatggttggttggtgtaatgaagaaggacattatgc  
aatgagtgtcccaaaaagaaa  
>Msativa2n|capsid-scaffold1797 136864 136954 213233  
TTTCTTTTTGGGACACTCATTTCGATAATGTCTTCTTCATTACACAACCAACATGTGCATGTTTTCTTA  
CCTTTAGGGCATGAATTCTTT  
>Msativa2n|capsid-scaffold2114 44938 45023 136287  
ATTCATGTCCCAAAGGTAAGAAAACATGCACATGTTGGTTGTGTCATGAAGAAGGACATTATGCAAATGA  
GTGTCCTAAGAAGAAA  
>Msativa2n|capsid-scaffold508 235157 235247 938428  
TTTCTTCTTAGGACACTCATTTCGATAATGTCTTCTTCATGACACAACCAACATGTGCATGTTTTCTTG  
CCTTTGGGACATGAATTCTTT  
>Msativa2n|capsid-scaffold377 767918 768009 1079537  
CTTTTTCTTCGGACACTCATTTCGATAATGTCTTCTTCATGGCACAACCAACATGTGCCAGTTTTCTTT  
CCTTTTGGGCAAGAAATTTTTCT  
>Msativa2n|capsid-scaffold945 216128 216218 335058  
AAAGAATTCATGTCCCTAAAGGCAAAAAACATGCACATGTTGGTTGTGTCATGAAGAAGGACATTATGCA  
AATGAGTGTCCTAAGAAGAAA  
>Msativa2n|capsid-scaffold1776 130122 130212 174602  
AAAGAATTCATGCCCTAAAGGCAAGAAAACATGCACATGTTGGTTGTGTCATGAAGAAGGACATTATGCA  
AATGAGTGTCCCAAAAAGAAA

=====  
=====

NOTE: the last three numbers stand for sequence start, end, and chr/scaffold length, respectively.\*All capsid EVEs belong to *Figwort mosaic virus*
