# Supplementary material for: Genome-wide identification of endogenous viral sequences in alfalfa (Medicago sativa L.)
Source: Springer Nature journal article supplement (doi:10.1186/s12985-021-01650-9), 2021-09-09
Supplement: MOESM3 [file 19647474]

# Figure S1

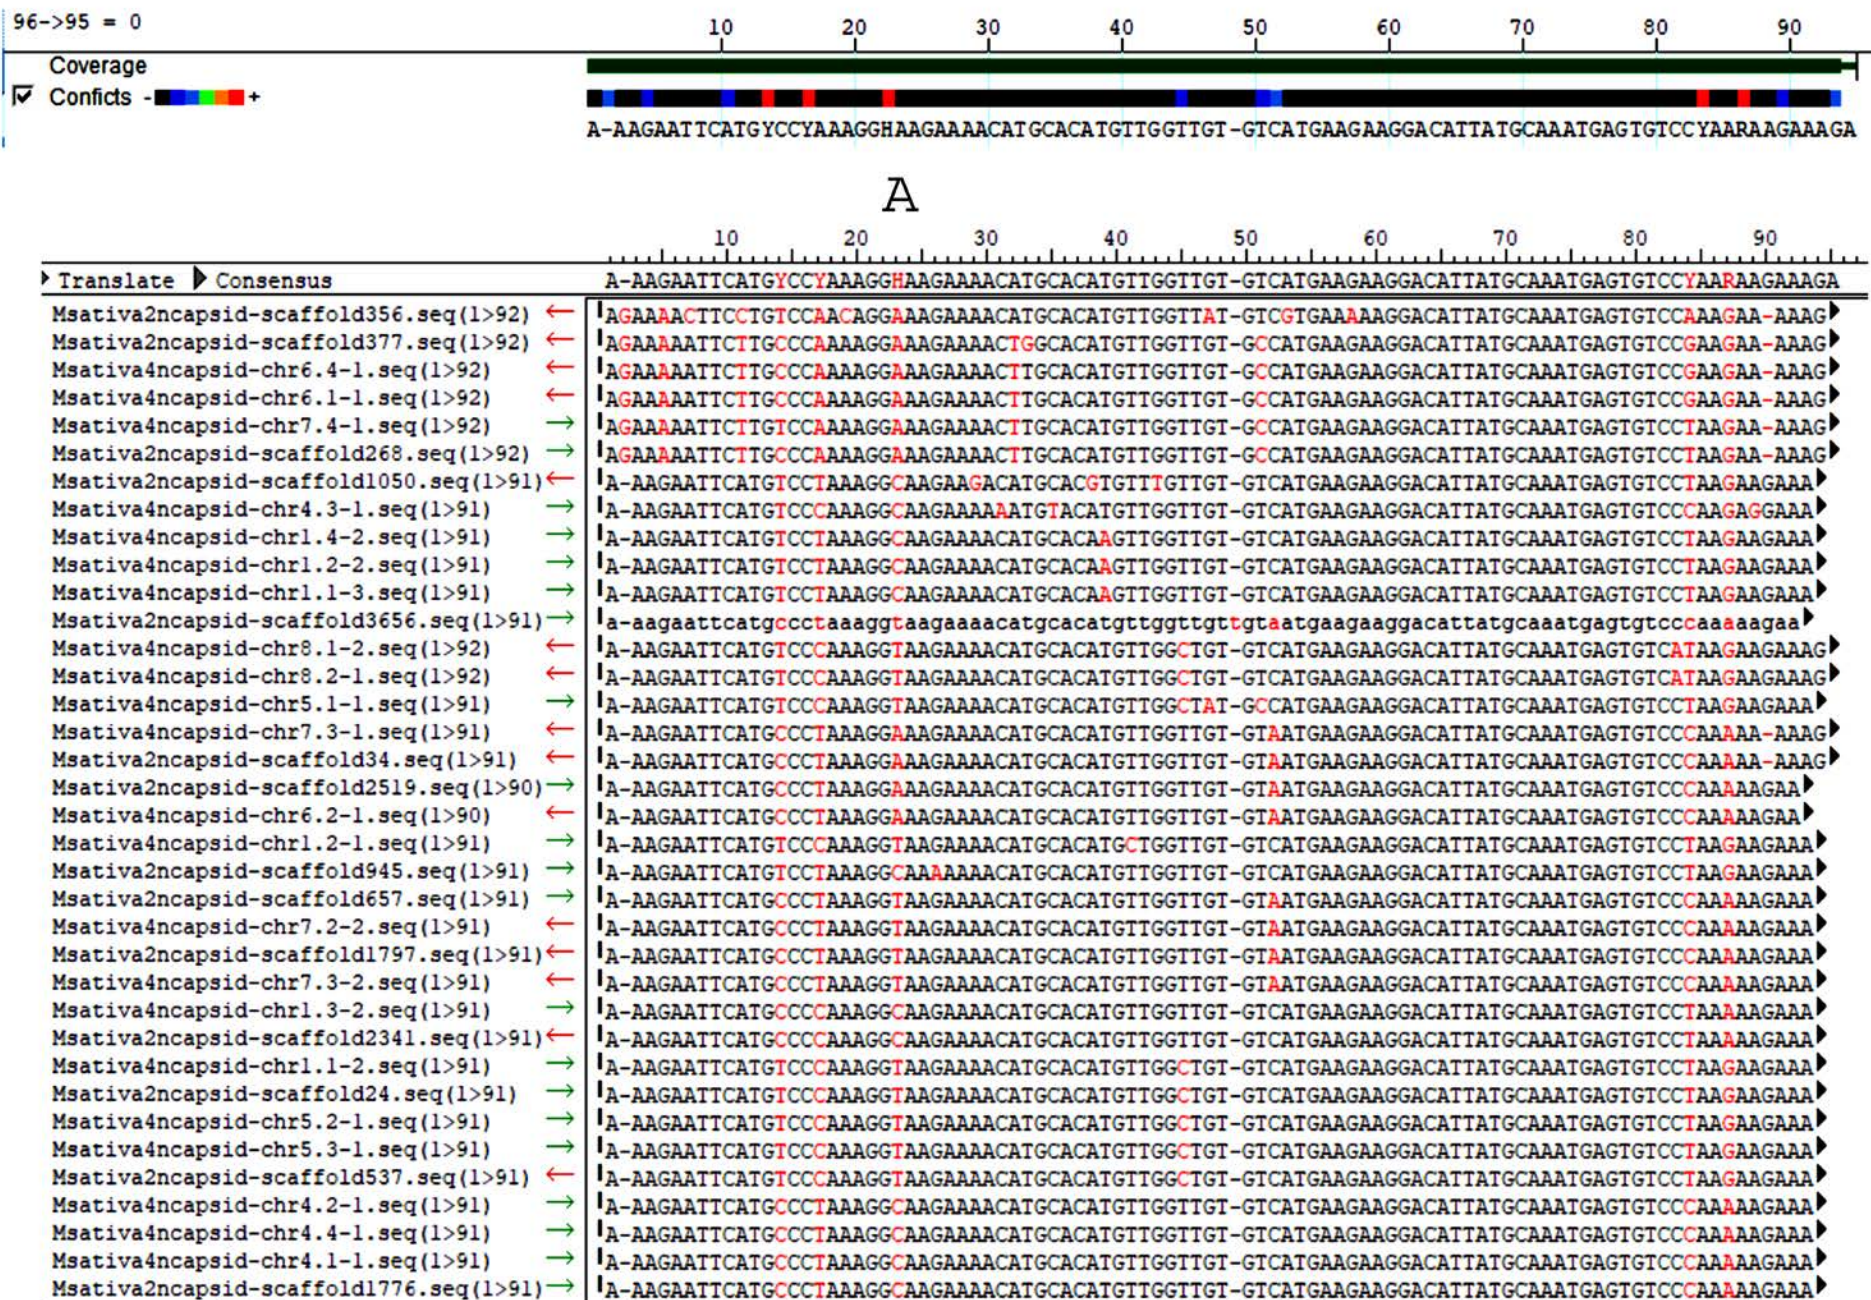

B
