# Supplementary material for: Genome-wide identification of endogenous viral sequences in alfalfa (Medicago sativa L.)
Source: Virol J. 2021 Sep 9;18:185. doi: 10.1186/s12985-021-01650-9 (PMC8428138; doi:10.1186/s12985-021-01650-9)
Supplement: Supplementary file 2 — Additional file 2. Table S1, page 1: Coordinates of the M. sativa genomic regions homologous to the SbCMV and FMV sequences. Table S1, page 2: PCR primers used for confirmation of randomly selected endogenous viral sequences [file 12985_2021_1650_MOESM2_ESM.xlsx]

## Sheet: P1
Table S1. Coordinates of the M. sativa genomic regions homologous to the SbCMV and FMV sequences.
Virus	Virus Acc	M. sativa Chr/scaffold	Chr/scaffold length	Chr coordinates		Identity, %	Size, bp	Viral protein
				start	end
M. sativa, tetraploid, chromosome assembly
SbCMV	NC_001739.2	chr3.2	93375939	12102514	12102273	75	241	Movement protein
FMV	NC_003554.1	chr1.1	82459472	24245905	24245998	82.11	93	Putative capsid protein
FMV	NC_003554.1	chr1.1	82459472	61882589	61882679	81.52	90	Putative capsid protein
FMV	NC_003554.1	chr1.1	82459472	52399578	52399668	80.43	90	Putative capsid protein
FMV	NC_003554.1	chr1.2	86910131	79956260	79956350	82.61	90	Putative capsid protein
FMV	NC_003554.1	chr1.2	86910131	53436684	53436774	80.43	90	Putative capsid protein
FMV	NC_003554.1	chr1.2	86910131	76498441	76498370	84.72	71	Putative capsid protein
FMV	NC_003554.1	chr1.3	79881340	22851264	22851357	82.11	93	Putative capsid protein
FMV	NC_003554.1	chr1.3	79881340	31015440	31015530	81.52	90	Putative capsid protein
FMV	NC_003554.1	chr1.3	79881340	50975912	50975822	81.52	90	Putative capsid protein
FMV	NC_003554.1	chr1.3	79881340	70582075	70582004	84.72	71	Putative capsid protein
FMV	NC_003554.1	chr1.3	79881340	70593747	70593676	84.72	71	Putative capsid protein
FMV	NC_003554.1	chr1.3	79881340	70618710	70618639	84.72	71	Putative capsid protein
FMV	NC_003554.1	chr1.4	88815615	24248476	24248569	82.11	93	Putative capsid protein
FMV	NC_003554.1	chr1.4	88815615	57162046	57162136	80.43	90	Putative capsid protein
FMV	NC_003554.1	chr2.2	74215936	66145004	66145094	82.61	90	Putative capsid protein
FMV	NC_003554.1	chr3.2	93375939	86276548	86276468	83.95	80	Putative capsid protein
FMV	NC_003554.1	chr3.4	100000000	58412334	58412399	84.85	65	Putative capsid protein
FMV	NC_003554.1	chr4.1	90245664	44420974	44421064	81.52	90	Putative capsid protein
FMV	NC_003554.1	chr4.2	93947428	48658594	48658684	81.52	90	Putative capsid protein
FMV	NC_003554.1	chr4.3	90228617	76987568	76987658	81.52	90	Putative capsid protein
FMV	NC_003554.1	chr4.4	90896203	48637844	48637934	81.52	90	Putative capsid protein
FMV	NC_003554.1	chr5.1	81211777	4026950	4027040	81.32	90	Putative capsid protein
FMV	NC_003554.1	chr5.2	84165483	79168509	79168599	81.52	90	Putative capsid protein
FMV	NC_003554.1	chr5.3	80712490	12480248	12480338	81.52	90	Putative capsid protein
FMV	NC_003554.1	chr5.4	78626892	66457747	66457654	82.11	93	Putative e capsid protein
FMV	NC_003554.1	chr5.4	78626892	53029674	53029604	83.78	70	Putative e capsid protein
FMV	NC_003554.1	chr6.1	80303593	53224576	53224485	81.91	91	Putative capsid protein
FMV	NC_003554.1	chr6.2	89579199	71199661	71199572	82.22	89	Putative capsid protein
FMV	NC_003554.1	chr6.4	64534737	39640936	39640845	81.91	91	Putative capsid protein
FMV	NC_003554.1	chr6.4	64534737	37908370	37908281	82.42	89	Putative capsid protein
FMV	NC_003554.1	chr7.2	93528358	6578622	6578532	81.52	90	Putative capsid protein
FMV	NC_003554.1	chr7.2	93528358	74367131	74367041	81.32	90	Probable capsid protein
FMV	NC_003554.1	chr7.2	93528358	80890790	80890880	81.52	90	Putative capsid protein
FMV	NC_003554.1	chr7.3	91580142	20541198	20541108	81.72	90	Putative capsid protein
FMV	NC_003554.1	chr7.3	91580142	74967052	74966962	81.32	90	Putative capsid protein
FMV	NC_003554.1	chr7.4	94657719	30505904	30505995	82.98	91	Putative capsid protein
FMV	NC_003554.1	chr8.1	87242343	45563252	45563162	81.52	90	Putative capsid protein
FMV	NC_003554.1	chr8.1	87242343	38416728	38416637	81.05	91	Putative capsid protein
FMV	NC_003554.1	chr8.1	87242343	17091974	17091889	81.61	85	Putative capsid protein
FMV	NC_003554.1	chr8.2	84274390	36532391	36532300	81.05	91	Putative capsid protein
FMV	NC_003554.1	chr8.3	82440740	42563376	42563286	81.52	90	Putative capsid protein
M. sativa, diploid, scaffold assembly
SbCMV	NC_001739.2	scaffold1037	504721	349115	349677	72.1	562	Movement protein
FMV	NC_003554.1	scaffold1	3010849	1601229	1601319	81.52	90	Putative capsid protein
FMV	NC_003554.1	scaffold1050	296422	251323	251233	80.43	90	Putative capsid protein
FMV	NC_003554.1	scaffold1776	174602	130122	130212	81.52	90	Putative capsid protein
FMV	NC_003554.1	scaffold1797	213233	136954	136864	81.32	90	Putative capsid protein
FMV	NC_003554.1	scaffold2114	136287	44938	45023	81.61	85	Putative capsid protein
FMV	NC_003554.1	scaffold2341	112209	62064	61974	81.52	90	Putative capsid protein
FMV	NC_003554.1	scaffold24	1172671	679399	679489	81.52	90	Putative capsid protein
FMV	NC_003554.1	scaffold2519	157492	99093	99182	82.22	89	Putative capsid protein
FMV	NC_003554.1	scaffold268	620361	544456	544547	81.91	91	Putative capsid protein
FMV	NC_003554.1	scaffold34	1744250	1556917	1556827	81.72	90	Putative capsid protein
FMV	NC_003554.1	scaffold342	981572	808411	808321	81.52	90	Putative capsid protein
FMV	NC_003554.1	scaffold356	739378	215884	215793	80.85	91	Putative capsid protein
FMV	NC_003554.1	scaffold3656	29304	6129	6219	81.32	90	Putative capsid protein
FMV	NC_003554.1	scaffold377	1079537	768009	767918	80.85	91	Putative capsid protein
FMV	NC_003554.1	scaffold396	543988	266735	266806	84.72	71	Putative capsid protein
FMV	NC_003554.1	scaffold508	938428	235247	235157	81.52	90	Putative capsid protein
FMV	NC_003554.1	scaffold537	1029455	814961	814871	81.52	90	Putative capsid protein
FMV	NC_003554.1	scaffold657	524074	124647	124737	81.32	90	Putative capsid protein
FMV	NC_003554.1	scaffold945	335058	216128	216218	80.43	90	Putative capsid protein

## Sheet: P2
PCR primers used for confirmation of endogenous viral sequences
LN968. Forward GGGTAGGAAACTATGGTTGTAATAGG. FMV_Msat4n|chr1.1.
LN969. Reverse GGTTCGAAACCTACTTCCCAAA. FMV_Msat4n|chr1.1.
LN970. Forward ACGGTTGTAATAAGTCCAGAAGAA. FMV_ Msativa4n|chr2.2.
LN971. Reverse CGAAACCTACTTGCCAGATCA. FMV_ Msativa4n|chr2.2.
LN978. Forward TTGTCGGATTAGTTTCAAGGTTTC . FMV_Msatchr3.2.
LN979. Reverse AGGATTGATCGATCGGAATACAG. FMV_Msat chr3.2.
LN.980. Forward GGTAGGTAACTACGGTTGTAATAAA. FMV_Msat chr5.1.
LN981. Reverse CTATTGGCTCGAAACCTACTTC, FMV_Msatchr5. 1.
